# Supplementary material for: Monopropionate analogues of DOTA4– and DTPA5–: kinetics of formation and dissociation of their lanthanide(iii) complexes
Source: Royal Society of Chemistry journal article supplement (doi:10.1039/b706353a), 2007-01-01
Supplement: b706353a.pdf [file b706353a.pdf]

# Monopropionate analogues of DOTA<sup>4-</sup> and DTPA<sup>5-</sup>: kinetics of formation and dissociation of their lanthanide(III) complexes

Edina Balogh, Raphaël Tripier, Petra Fouskova, Felipe Reviriego, Henri Handel, Éva Tóth

Fig. S1. Titration curves of H<sub>4</sub>DO3A-*N*prop in the absence and in the presence of various metal ions at 25°C, 0.1 M KCl; c<sub>lig</sub> = 0.003 M

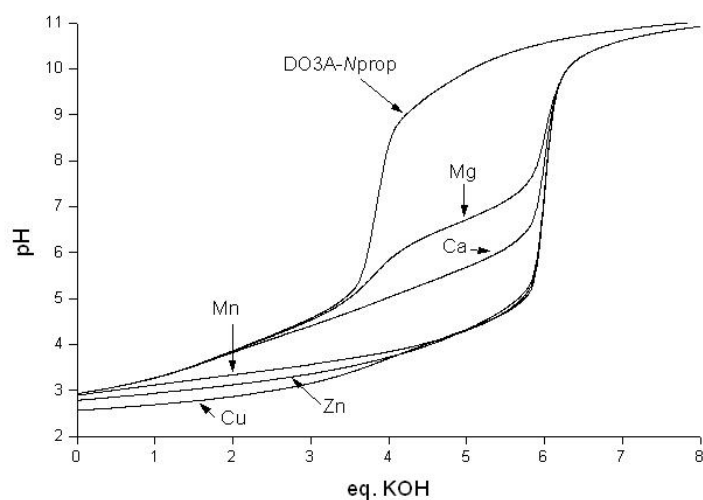

**Table S1.** Formation rate constants of (CeDO3A-*N*prop)<sup>-</sup> obtained from UV-Vis measurements at different pH, 0.1 M KCl, 25°C.

|                             | 4.26                    | 4.6                     | 4.92                    | 5.21                    | 5.01                    | 5.45                    |
|-----------------------------|-------------------------|-------------------------|-------------------------|-------------------------|-------------------------|-------------------------|
| [Ce <sup>3+</sup> ]<br>(mM) | k (s <sup>-1</sup> )    |
| 0.1                         | 2.47 × 10 <sup>-3</sup> | 5.70 × 10 <sup>-3</sup> | 1.04 × 10 <sup>-2</sup> | 1.55 × 10 <sup>-2</sup> | 1.17 × 10 <sup>-2</sup> | 2.79 × 10 <sup>-2</sup> |
| 0.2                         | 3.02 × 10 <sup>-3</sup> | 6.19 × 10 <sup>-3</sup> | 1.08 × 10 <sup>-2</sup> | 1.64 × 10 <sup>-2</sup> | 1.21 × 10 <sup>-2</sup> | 3.29 × 10 <sup>-2</sup> |
| 0.4                         | 3.85 × 10 <sup>-3</sup> | 6.64 × 10 <sup>-3</sup> | 1.11 × 10 <sup>-2</sup> | 1.83 × 10 <sup>-2</sup> | 1.30 × 10 <sup>-2</sup> | 3.51 × 10 <sup>-2</sup> |
| 0.6                         | 4.02 × 10 <sup>-3</sup> | 7.11 × 10 <sup>-3</sup> | 1.15 × 10 <sup>-2</sup> | 2.04 × 10 <sup>-2</sup> | 1.39 × 10 <sup>-2</sup> | 3.72 × 10 <sup>-2</sup> |
| 1                           | 4.18 × 10 <sup>-3</sup> | 7.04 × 10 <sup>-3</sup> | 1.20 × 10 <sup>-2</sup> | 2.00 × 10 <sup>-2</sup> | 1.63 × 10 <sup>-2</sup> | 3.60 × 10 <sup>-2</sup> |
| 1.5                         | 4.19 × 10 <sup>-3</sup> | 7.81 × 10 <sup>-3</sup> | 1.30 × 10 <sup>-2</sup> | 2.10 × 10 <sup>-2</sup> | 1.64 × 10 <sup>-2</sup> | 3.79 × 10 <sup>-2</sup> |
| 2                           | 4.32 × 10 <sup>-3</sup> | 7.85 × 10 <sup>-3</sup> | 1.21 × 10 <sup>-2</sup> | 2.07 × 10 <sup>-2</sup> | 1.81 × 10 <sup>-2</sup> | 3.87 × 10 <sup>-2</sup> |

**Table S2.** Formation rate constants of  $(\text{GdDO3A-Nprop})^-$  obtained from UV-Vis measurements at different pH, 0.1 M KCl, 25°C.

|                         | <b>3.92</b>             | <b>4.17</b>             | <b>4.09</b>             | <b>4.26</b>             |
|-------------------------|-------------------------|-------------------------|-------------------------|-------------------------|
| $[\text{Gd}^{3+}]$ (mM) | $k$ ( $\text{s}^{-1}$ ) |
| 0.6                     | $1.49 \times 10^{-3}$   | $3.25 \times 10^{-3}$   | $2.88 \times 10^{-3}$   | $4.04 \times 10^{-3}$   |
| 1.0                     | $2.06 \times 10^{-3}$   | $3.46 \times 10^{-3}$   | $3.12 \times 10^{-3}$   | $4.41 \times 10^{-3}$   |
| 2.0                     |                         | $4.03 \times 10^{-3}$   | $3.40 \times 10^{-3}$   | $4.54 \times 10^{-3}$   |
| 3.0                     | $2.33 \times 10^{-3}$   | $4.03 \times 10^{-3}$   | $3.50 \times 10^{-3}$   | $4.99 \times 10^{-3}$   |
| 4.0                     | $2.64 \times 10^{-3}$   | $3.95 \times 10^{-3}$   | $3.60 \times 10^{-3}$   | $4.86 \times 10^{-3}$   |
| 5.0                     | $2.54 \times 10^{-3}$   | $3.85 \times 10^{-3}$   | $3.67 \times 10^{-3}$   | $4.92 \times 10^{-3}$   |
| 6.0                     | $2.54 \times 10^{-3}$   | $3.85 \times 10^{-3}$   | $3.71 \times 10^{-3}$   | $4.92 \times 10^{-3}$   |

**Table S3.** Formation rate constants of  $(\text{YbDO3A-Nprop})^-$  obtained from UV-Vis measurements at different pH, 0.1 M KCl, 25°C.

| pH                      | <b>4.27</b>             | <b>4.35</b>             | <b>4.17</b>             | <b>3.91</b>             |
|-------------------------|-------------------------|-------------------------|-------------------------|-------------------------|
| $[\text{Yb}^{3+}]$ (mM) | $k$ ( $\text{s}^{-1}$ ) |
| 0.6                     | $6.27 \times 10^{-3}$   | $7.22 \times 10^{-3}$   | $5.26 \times 10^{-3}$   | $4.14 \times 10^{-3}$   |
| 1.0                     | $6.61 \times 10^{-3}$   | $8.00 \times 10^{-3}$   | $5.53 \times 10^{-3}$   | $4.41 \times 10^{-3}$   |
| 2.0                     | $7.18 \times 10^{-3}$   | $8.19 \times 10^{-3}$   | $5.95 \times 10^{-3}$   | $5.08 \times 10^{-3}$   |
| 3.0                     | $7.53 \times 10^{-3}$   | $8.63 \times 10^{-3}$   | $6.25 \times 10^{-3}$   |                         |
| 4.0                     | $7.60 \times 10^{-3}$   | $8.76 \times 10^{-3}$   | $6.23 \times 10^{-3}$   | $5.28 \times 10^{-3}$   |
| 5.0                     | $7.69 \times 10^{-3}$   | $8.24 \times 10^{-3}$   | $6.51 \times 10^{-3}$   | $5.66 \times 10^{-3}$   |
| 6.0                     | $7.65 \times 10^{-3}$   | $8.46 \times 10^{-3}$   | $6.48 \times 10^{-3}$   |                         |

**Table S4.** Dissociation rate constants of (GdDTTA-*Nprop*)<sup>2-</sup> in the presence of Eu<sup>3+</sup> following the changes of <sup>1</sup>H-relaxivity at 200 MHz, at different pH, 0.1 M KCl, 25°C.

| pH                       | 4.92                    | 5.01                    | 5.24                    | 5.19                    | 5.43                    |
|--------------------------|-------------------------|-------------------------|-------------------------|-------------------------|-------------------------|
| [Eu <sup>3+</sup> ] (mM) | k (s <sup>-1</sup> )    |
| 0.03                     | 2.57 × 10 <sup>-3</sup> | 2.17 × 10 <sup>-3</sup> | 1.01 × 10 <sup>-3</sup> | 1.62 × 10 <sup>-3</sup> | 5.38 × 10 <sup>-4</sup> |
| 0.02                     | 3.49 × 10 <sup>-3</sup> | 2.41 × 10 <sup>-3</sup> | 9.64 × 10 <sup>-4</sup> | 1.72 × 10 <sup>-3</sup> | 7.16 × 10 <sup>-4</sup> |
| 0.01                     | 5.72 × 10 <sup>-3</sup> | 2.92 × 10 <sup>-3</sup> | 1.41 × 10 <sup>-3</sup> | 2.50 × 10 <sup>-3</sup> | 5.83 × 10 <sup>-4</sup> |
| 0.005                    | 1.00 × 10 <sup>-2</sup> | 5.20 × 10 <sup>-3</sup> | 1.94 × 10 <sup>-3</sup> | 3.30 × 10 <sup>-3</sup> | 8.50 × 10 <sup>-4</sup> |

**Table S5.** Dissociation rate constants of (GdDTTA-*Nprop*)<sup>2-</sup> in the presence of Zn<sup>2+</sup> following the changes of <sup>1</sup>H-relaxivity at 200 MHz, at different pH, 0.1 M KCl, 25°C.

| pH                       | 4.85                    | 5.14                    | 4.96                    | 5.5                     |
|--------------------------|-------------------------|-------------------------|-------------------------|-------------------------|
| [Zn <sup>2+</sup> ] (mM) | k (s <sup>-1</sup> )    |
| 0.03                     | 5.88 × 10 <sup>-3</sup> | 5.72 × 10 <sup>-3</sup> | 6.41 × 10 <sup>-3</sup> | 6.26 × 10 <sup>-3</sup> |
| 0.02                     | 5.25 × 10 <sup>-3</sup> | 5.53 × 10 <sup>-3</sup> | 5.12 × 10 <sup>-3</sup> | 5.97 × 10 <sup>-3</sup> |
| 0.01                     | 3.73 × 10 <sup>-3</sup> | 3.18 × 10 <sup>-3</sup> | 3.46 × 10 <sup>-3</sup> | 3.53 × 10 <sup>-3</sup> |
| 0.005                    | 2.60 × 10 <sup>-3</sup> | 2.43 × 10 <sup>-3</sup> | 2.10 × 10 <sup>-3</sup> | 2.99 × 10 <sup>-3</sup> |

**Table S6.** Observed dissociation rate constants of  $(\text{CeDO3A-Nprop})^{2-}$  as a function of proton concentration, determined from the changes in UV-Vis absorption.

| $[\text{H}^+]$ (M) | $k_d$ ( $\text{s}^{-1}$ ) |
|--------------------|---------------------------|
| 0.1999             | 0.0742                    |
| 0.1803             | 0.0664                    |
| 0.1499             | 0.0647                    |
| 0.1245             | 0.0471                    |
| 0.1147             | 0.0429                    |
| 0.1000             | 0.0416                    |
| 0.0902             | 0.0364                    |
| 0.0794             | 0.0320                    |
| 0.0706             | 0.0287                    |
| 0.0631             | 0.0262                    |
| 0.0550             | 0.0267                    |
| 0.0446             | 0.0225                    |
| 0.0300             | 0.0182                    |
| 0.0200             | 0.0143                    |
| 0.0158             | 0.0121                    |
| 0.0126             | 0.0097                    |
| 0.0099             | 0.0082                    |
| 0.0059             | 0.0047                    |
| 0.0030             | 0.0018                    |
